# Supplementary material for: A UPLC-MS/MS Based Rapid, Sensitive, and Non-Enzymatic Methodology for Quantitation of Dietary Isoflavones in Biological Fluids
Source: MDPI journal article supplement (doi:10.3390/molecules28186729), 2023-09-21
Supplement: s1 [file s1]

## Supplementary Table S1

Summary of few previously reported Isoflavone methods with newly developed method with same Matrix (Urine) and LOQ may be added as supplement information if needed.

| Author                 | Enzyme based Extraction           | Matrix (Urine) | Analysis Time | Diadzein (ng/ml) | Genistein (ng/ml) | S-equol (ng/ml) |
|------------------------|-----------------------------------|----------------|---------------|------------------|-------------------|-----------------|
| Landon Wilson (2014)   | $\beta$ -glucuronidase /sulfatase | Urine          | 30 mins       | 1.2              | 0.15              | 1.27            |
| Yaoyue Liang (2018)    | no enzyme                         | Urine          | 30 mins       | 157              | 157               | 157             |
| Soukup (2014)          | no enzyme                         | Urine/Plasma   | 25 mins       | 6.4              | 3.8               | 63.5            |
| Philip B. Grace (2007) | $\beta$ -glucuronidase /sulfatase | Urine/Plasma   | 10 mins       | 2.0              | 2.0               | 2.0             |
| Current Method         | No enzyme                         | urine          | 05 mins       | 2.2              | 4.0               | 2.0             |

25. Wilson L, Arabshahi A, Simons B, Prasain JK, Barnes S. Improved high sensitivity analysis of polyphenols and their metabolites by nano-liquid chromatography-mass spectrometry. Arch Biochem Biophys. 2014 Oct 1;559:3-11. doi: 10.1016/j.abb.2014.06.014. Epub 2014 Jun 23. PMID: 24967696; PMCID: PMC4143533.
26. Liang Y, Zhao W, Wang C, Wang Z, Wang Z, Zhang J. A Comprehensive Screening and Identification of Genistin Metabolites in Rats Based on Multiple Metabolite Templates Combined with UHPLC-HRMS Analysis. Molecules. 2018 Jul 26;23(8):1862. doi: 10.3390/molecules23081862. PMID: 30049985; PMCID: PMC6222673.
27. Soukup, S. T., Al-Maharik, N., Botting, N., & Kulling, S. E. (2014). Quantification of soy isoflavones and their conjugative metabolites in plasma and urine: an automated and validated UHPLC-MS/MS method for use in large-scale studies. Analytical and Bioanalytical Chemistry, 406(24), 6007–6020. doi:10.1007/s00216-014-8034-y.
28. Philip B. Grace, Nayan S. Mistry, Megan H. Carter, Anthony J.C. Leathem, Philip Teale, High throughput quantification of phytoestrogens in human urine and serum using liquid chromatography/tandem mass spectrometry (LC-MS/MS), Journal of Chromatography B, Volume 853, Issues 1–2, 2007, Pages 138-146.
